# Supplementary material
Source: PubMed Central journal article supplement (PMC3315208)
Supplement: supp_dds022_dds022supp.pdf [file supp_dds022_dds022supp.pdf]

**Supplementary Table 1. Primers used for PCR amplification and sequencing of the myopalladin gene.**

| Exon | Forward primer sequence<br>5'->3' | Reverse primer sequence<br>5'->3' | Annealing<br>temperature |
|------|-----------------------------------|-----------------------------------|--------------------------|
| 2    | CGAGTCTGCAGTGCTATAAT              | AAATGATAATACTTGGGAGG              | 54°C                     |
| 3    | GCTCATTTAAGAGAATATCT              | AGGCCCTCAATAAATATTTA              | 54°C                     |
| 4    | TACTGAGTTCATTTATAAGA              | GTAACCAATTAATCATTCTC              | 52°C                     |
| 5    | GCAGTGATGCCATTACTAGT              | ATGGTCATGGTCACCATGAC              | 50°C                     |
| 6    | TAAACTTAGAATACATCAGTT             | ATCTTGTATCCTATAACTTT              | 54°C                     |
| 7    | TTTTTCTAAAATTCAACACC              | AAAATAAGTGTGTACAATAA              | 58°C                     |
| 8    | TGAAATTCTATAGGAAGCTT              | ATCTCAGTGTAACCTCATT               | 60°C                     |
| 9    | TTGTAGAATCATCATCTGAT              | GGAATGGAAACACAAAATCT              | 60°C                     |
| 10   | AACACTTCCCATTTGTGCA               | GTTCCATTACTTTTAAGGAG              | 58°C                     |
| 11   | GAAAGGTGAGGCCAATAATA              | CAAGCTATTCAATGTGCACA              | 58°C                     |
| 12   | GATTTCTAGGCCTTTTTACC              | GAGGACTGAATCAAGCAAAA              | 68°C                     |
| 13   | CCTCAATTGTACTGATGGAC              | AGGCACTGTCTATAGCTTCA              | 60°C                     |
| 14   | CAGACCCTAGTTCATTAACC              | AGGTCTCATTCAATGACA                | 60°C                     |
| 15   | GGTGTCTGGTCCAGAAATT               | TACTTTGGTGCTCACGATAG              | 52°C                     |
| 16   | ATGCCTATTATCATAAGTTT              | CCACAAAACAAATACAAATA              | 58°C                     |
| 17   | GATAAAGAATTCAGCCATCA              | CTCTTTGGGTAATGACTTTG              | 56°C                     |
| 18   | AGCAAGACTCTGTCTCAAAA              | ATAGCAGCAGACTTATTTGG              | 58°C                     |
| 19   | TCCTGGAACCCTAAATTTGA              | TGCCTGACCCATTTATCTTT              | 60°C                     |
| 20   | TGAGGACAGAATGCACCTCT              | CTTGGAACCACCAAGTCTG               | 60°C                     |

Comments: All PCR reactions were performed at 40 cycles using Platinum®*Taq* DNA Polymerase (Invitrogen) according to the manufacturer's manuals.

**Supplementary Table 2. Distribution of myopalladin genotypes in patients and control cohort.**

|    | Location | Nucleotide change | Amino acid change<br>Codon | HCM patients<br>(n=484) | DCM patients<br>(n=348) | RCM patients<br>(n=68) | Control<br>(n=1020) | dbSNP       |
|----|----------|-------------------|----------------------------|-------------------------|-------------------------|------------------------|---------------------|-------------|
| 1  | Exon2    | GCC GCG           | p.A155A                    | 0                       | 0                       | 0                      | 1                   | rs142867001 |
| 2  |          | CCA CCG           | p.P281P                    | 0                       | 0                       | 0                      | 1                   | rs74143022  |
| 3  | Exon 4   | AAT AAC           | p.N376N                    | 1                       | 0                       | 0                      | 0                   | synonymous  |
| 4  |          | GGC GGU           | p.G368G                    | 1                       | 0                       | 0                      | 0                   | rs144764983 |
| 5  | Exon 5   | GTC GCC           | p.V393A                    | 7                       | 3                       | 0                      | 12                  | rs11596653  |
| 6  | Exon 6   | CAG CAA           | p.Q417Q                    | 5                       | 0                       | 0                      | -                   | rs10997948  |
| 7  | Exon 7   | GAG AAG           | p.E467K                    | 1                       | 0                       | 0                      | 3                   | rs74143030  |
| 8  |          | ACT ACC           | p.T473T                    | 1                       | 0                       | 0                      | 3                   | synonymous  |
| 9  | Exon 10  | TCT TCC           | p.549SS                    | 3                       | 0                       | 0                      | -                   | rs2673794   |
| 10 |          | GAG AAG           | p.E614K                    | 3                       | 0                       | 0                      | 3                   | rs143338091 |
| 11 |          | ACC ACA           | p.T623T                    | 1                       | 16                      | 0                      | 35                  | rs1854624   |
| 12 |          | CCC CCT           | p.P625P                    | 6                       | 12                      | 0                      | -                   | rs2673793   |
| 13 |          | TTC TTG           | p.F628L                    | 6                       | 9                       | 0                      | 7                   | rs10823148  |
| 14 | Exon 11  | ACC AGC           | p.N691S                    | 7                       | 7                       | 0                      | 6                   | rs10997975  |
| 15 |          | AGT AAT           | p.S707N                    | 7                       | 0                       | 0                      | -                   | rs7916821   |
| 16 |          | GCC GCA           | p.A721A                    | 3                       | 0                       | 0                      | -                   | rs71584491  |
| 17 |          | AGG AGC           | p.S803R                    | 4                       | 0                       | 0                      | 2                   | rs3814182   |
| 18 |          | GGA AGA           | p.G804R                    | 1                       | 0                       | 0                      | 2                   | rs62620248  |
| 21 | Exon 13  | CGG CAG           | p.R955Q                    | 0                       | 2                       | 0                      | 3                   | rs149887823 |
| 22 | Exon 16  | CCG CCA           | p.P1073P                   | 1                       | 0                       | 0                      | 3                   | synonymous  |
| 23 | Exon 17  | CCA ACA           | p.P1135T                   | 0                       | 4                       | 0                      | 6                   | rs7079481   |
| 24 |          | CGC CGT           | p.R1139R                   | 2                       | 0                       | 0                      | 3                   | synonymous  |
| 25 | Exon 20  | GTG GGG           | p.V1306G                   | 0                       | 1                       | 0                      | 3                   |             |

Comments: Genetic variants described in Table 1 are not included in the supplementary table. Data is updated as November 08, 2011.

**A**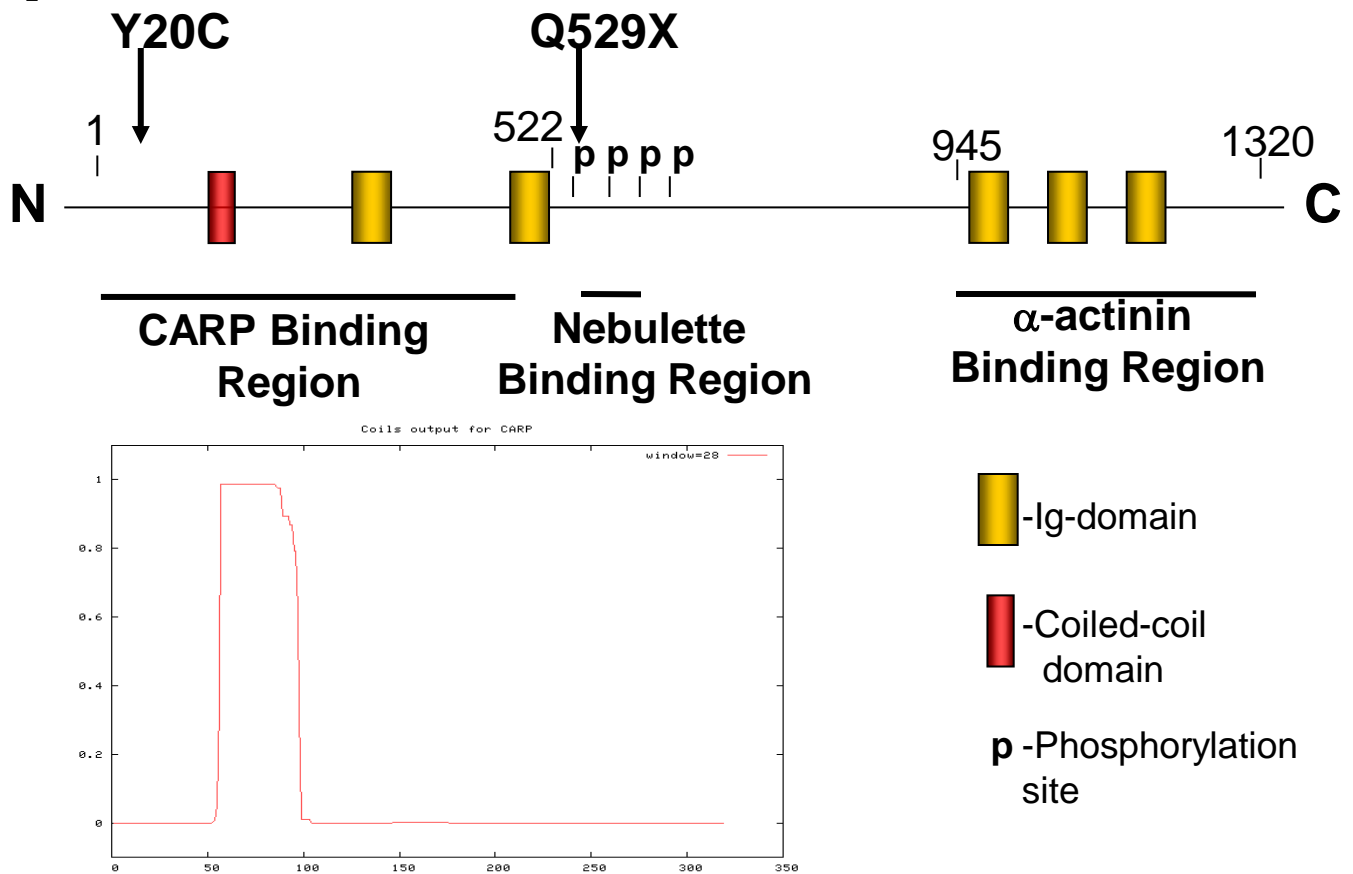**B**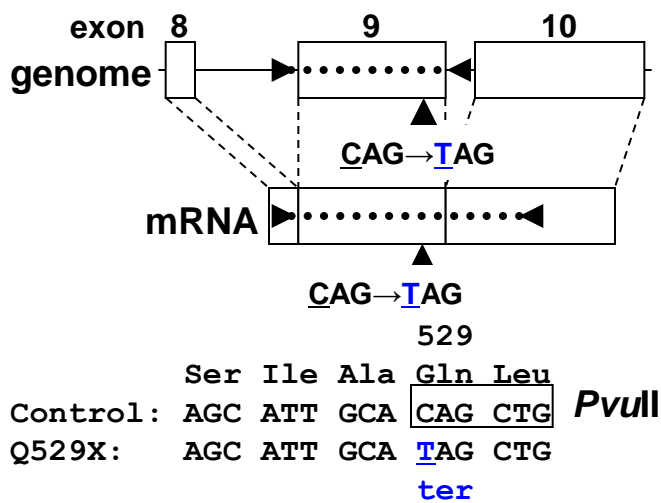

mRNA expression

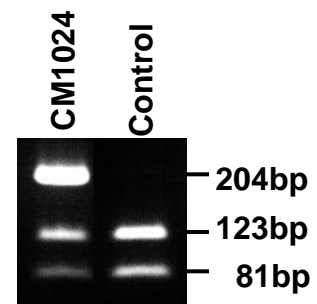**C**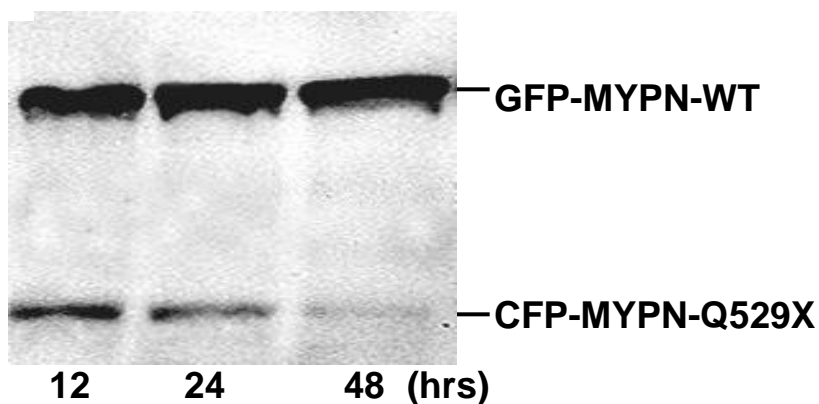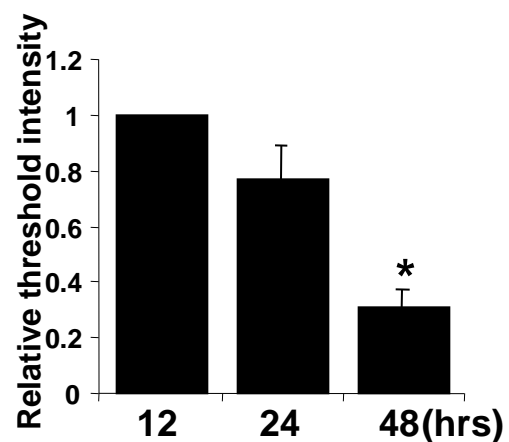

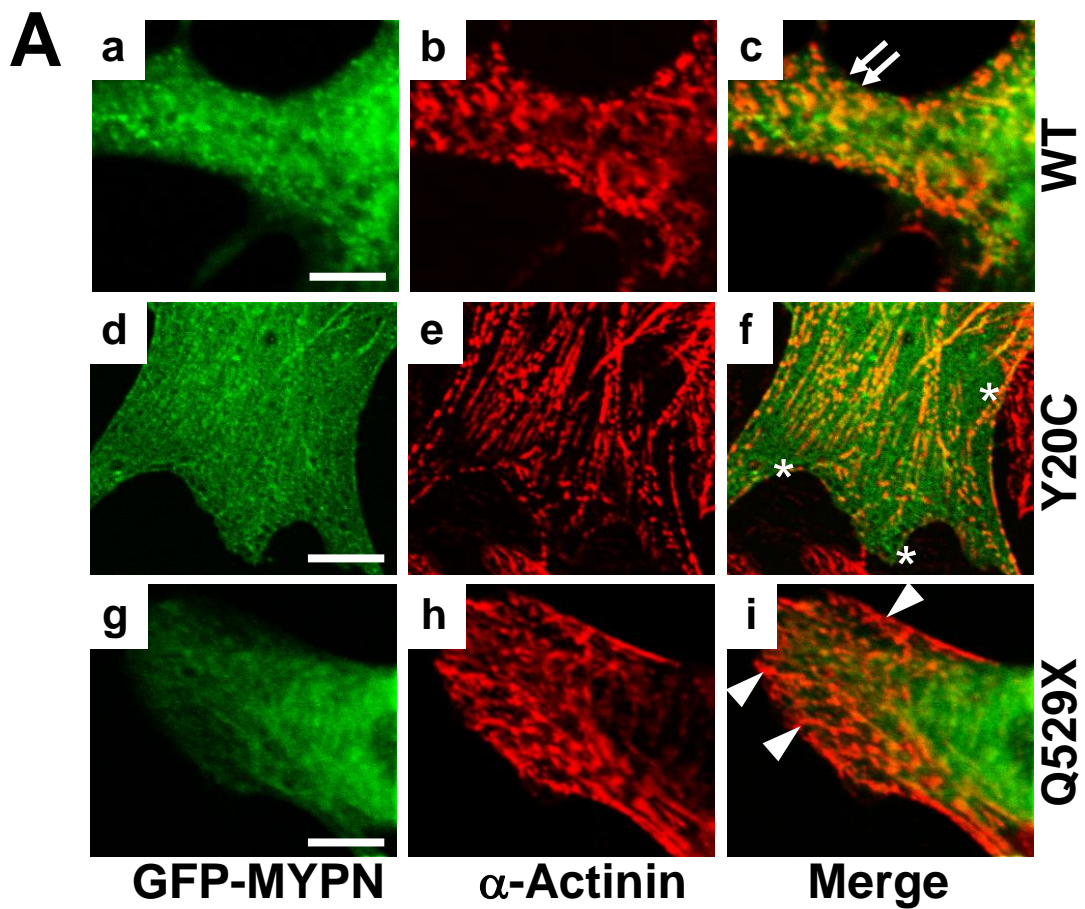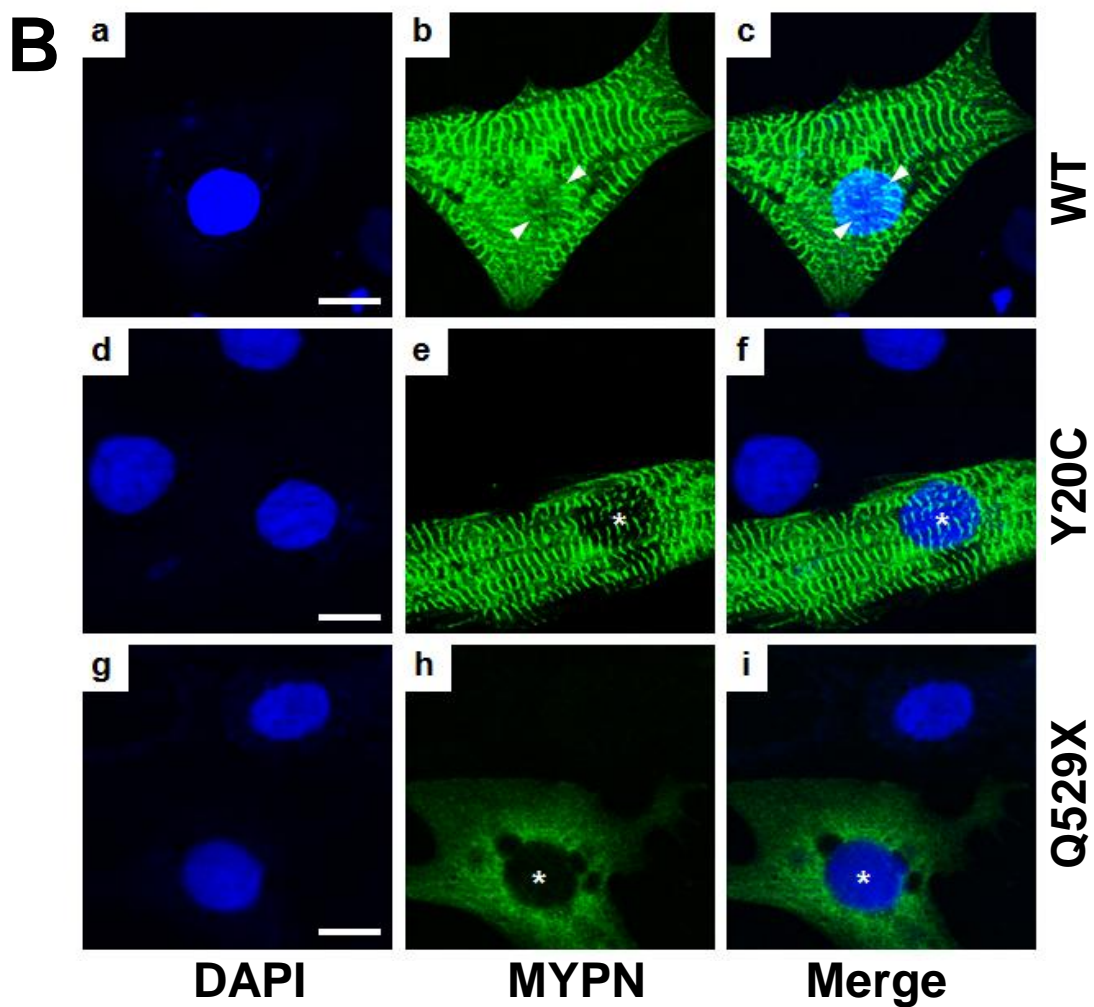

## Legends to Supplementary Figures.

### Supplementary Figure 1.

**A.** Structure of MYPN protein and functional regions. Y20C is located at the CARP-binding domain of the N-terminal of MYPN upstream to coiled-coil region, while Q529X truncates last three Ig-domains of MYPN. Lower panel demonstrates predicted coils for CARP affinity.

**B.** *Pvu*II digestion pattern of RT-PCR products from paraffin-embedded myocardium of the RCM patient CM1024 and control. Forward and reverse primers for PCR analysis were designed in exon 8 and 10, respectively. Mutant allele was expressed at a similar level as the normal allele and no abnormal exon-skipping was observed (left panel).

**C.** Expression of GFP-MYPN-WT and CFP-MYPN-Q529X. Proteins were extracted from HeLa cells at 12, 24, and 48 h after the transfection with equal amount of each MYPN construct, and detected with anti-Living Colors antibody followed by secondary antibody. Western blot of showed progressive decrease of CFP-MYPN-Q529X compared to GFP-MYPN-WT (left panel). Data from repetitive experiments are shown on right. Relative amount of CFP-MYPN-Q529X to GFP-MYPN-WT at 12 h after the transfection was set to 1.0 and those at 24 h and 48 h after the transfection was calculated by assuming that the amount of GFP-MYPN was not changed during the experimental course. Data are represented as mean  $\pm$  S.D. \*,  $P < 0.001$ .

## Supplementary Figure 2.

**A.** Co-localization of MYPN and  $\alpha$ -actinin in immature NRCs. NRCs transfected with GFP-WT-MYPN (a-c), GFP-Y20C-MYPN (d-f), or GFP-Q529X-MYPN (g-i) were immunostained with anti- $\alpha$ -actinin antibody (b, e, and h). Merged images of GFP and anti- $\alpha$ -actinin in red are shown (c, f, and i). Sarcomeric  $\alpha$ -actinin is co-localized with GFP-WT-MYPN (c, white arrows) in the Z bodies at the spreading ends of the NRCs, while GFP-Y20C-MYPN demonstrates diffuse localization and lack of co-localization with  $\alpha$ -actinin (f, asterisks). Decreased GFP-Q529X-MYPN expression at the periphery of NRCs is also noted (i, white arrowheads). Scale bars indicate 5 $\mu$ m.

**B.** Nuclear localization of MYPN in neonatal rat cardiomyocytes. Nuclei of NRCs transfected with GFP-WT-MYPN (a-c), GFP-Y20C-MYPN (d-f), or GFP-Q529X-MYPN (g-i) are stained with DAPI (a, d, and g). GFP signals linked to MYPN are not observed in the nuclei with GFP-Y20C-MYPN and GFP-Q529X-MYPN (asterisks), while GFP-WT-MYPN is observed at the Z-discs and nucleus (arrowheads). Bars=10 $\mu$ m.
